# Supplementary material for: Experiences Accessing and Receiving Tumour Genetic Profiling in Victoria: A Consumer-Led Cross-Sectional Survey Study
Source: Research Square preprint supplement (doi:10.21203/rs.3.rs-6508330/v1), 2025-06-17
Supplement: Supplementary file 4 [file a1a31e648ab3dc03eacc2397.docx]

**EXPERIENCES ACCESSING AND RECEIVING TUMOUR GENETIC PROFILING IN VICTORIA: A CONSUMER-LED CROSS-SECTIONAL SURVEY STUDY**

**Victorian Comprehensive Cancer Centre (VCCC) Alliance Personalised Cancer Care Consumer Reference Group:** Kathleen Minas1*, Melissa Sheldon1*, Sonja Ilievska1*, Naveena Nekkalapudi1*, Kenneth Young1*, Jonathan Ashley Granek1*, Victoria Sharp1*, Beth Doggett1*

**Victorian Comprehensive Cancer Centre (VCCC) Alliance staff**: Genevieve Dall1, Joanne M Britto1, Nonie Chan1, Michelle Barrett1, Mark Buzza 1. **Research Support Team (University of Melbourne):** Tamara Jones2, Sarah Stratulate,2,3 Camille E Short.2,3

*Equal first author

# Supplementary file 4. Shared Decision-Making Process Scale – Individual Items

| **How much did you and your health care providers talk about the reasons you/the person you care or cared for might want to have tumour genetic profiling?*** | | | |
| --- | --- | --- | --- |
| Not at all | 3 (9) | 3 (33) | 6 (14) |
| A little | 4 (11) | 2 (22) | 6 (14) |
| Some | 11 (31) | 0 (0) | 11 (25) |
| A lot | 13 (37) | 3 (33) | 16 (36) |
| Missing | 4 (11) | 1 (11) | 5 (11) |
| **How much did you and your health care providers talk about the reasons you/the person you care or cared for might not want to have tumour genetic profiling?*** | | | |
| Not at all | 16 (46) | 5 (56) | 21 (48) |
| A little | 7 (20) | 0 (0) | 7 (16) |
| Some | 6 (17) | 1 (11) | 7 (16) |
| A lot | 2 (6) | 1 (11) | 3 (7) |
| Missing | 4 (11) | 1 (11) | 5 (11) |
| **Did any of your health care providers explain that there were choices in what you/the person you care or cared for could do to treat your cancer?*** | | | |
| Yes | 24 (69) | 6 (67) | 30 (68) |
| No | 7 (20) | 2 (22) | 9 (20) |
| Missing | 4 (11) | 1 (11) | 5 (11) |
| **Did any of your health care providers ask if you /the person you care or cared for wanted to have tumour genetic profiling?*** | | | |
| Yes | 19 (54) | 5 (56) | 24 (55) |
| No | 12 (34) | 3 (33) | 15 (34) |
| Missing | 4 (11) | 1 (11) | 5 (11) |
